# Supplementary material for: Effects of heat and drought on carbon and water dynamics in a regenerating semi-arid pine forest: a combined experimental and modeling approach
Source: Copernicus journal article supplement (doi:10.5194/bg-11-4139-2014), 2014-08-06
Supplement: Supplementary file 1 [file bg-11-4139-2014-supplement.pdf]

Supplement of Biogeosciences, 11, 4139–4156, 2014  
<http://www.biogeosciences.net/11/4139/2014/>  
doi:10.5194/bg-11-4139-2014-supplement  
© Author(s) 2014. CC Attribution 3.0 License.

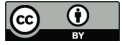

*Supplement of*

**Effects of heat and drought on carbon and water dynamics in a regenerating semi-arid pine forest: a combined experimental and modeling approach**

**N. K. Ruehr et al.**

*Correspondence to:* N. K. Ruehr (nadine.ruehr@kit.edu)

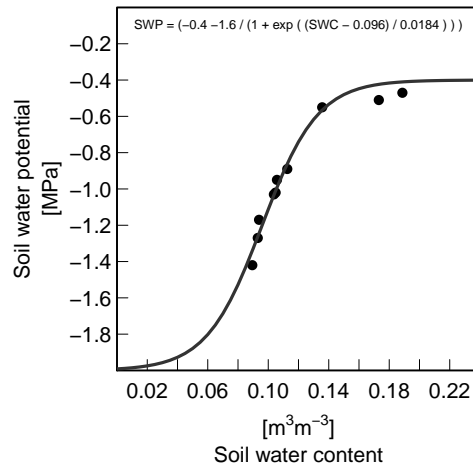

Figure S1: Relationship of soil water potential (SWP) with soil water content (SWC, 10–90 cm depth), described by a sigmoid function ( $R^2 = 0.98$ ), assuming a SWP of  $-2$  MPa at SWC of  $0 \text{ m}^3\text{m}^{-3}$  ( $-1.8$  MPa was minimum leaf water potential measured midday).

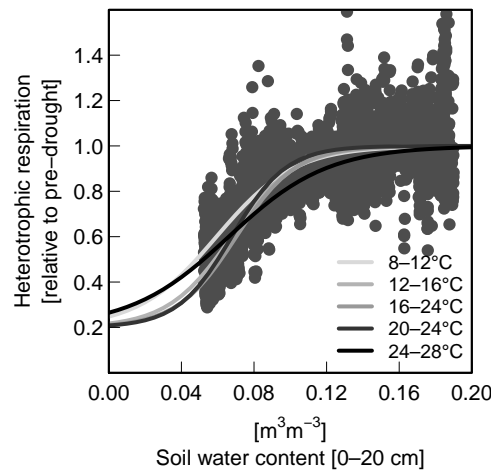

Figure S2: Heterotrophic respiration ( $R_h$ ) relative to pre-drought conditions ( $0.15 < \text{SWC} < 0.19$ ) vs. soil water content of half-hourly measurements during the summer 2011. The relationship of  $R_h$  relative to pre-drought conditions with SWC is described by sigmoid functions ( $R^2 = 0.67\text{--}0.75$ ) for 5 different temperature classes. The sigmoid function for the temperature class  $16\text{--}24^\circ\text{C}$  (average soil temperature during summer) used to describe the drought-sensitivity in the model is:  $y = 0.2 + 0.8 / (1 + \exp(-( \text{SWC} - 0.07 ) / 0.016))$ .

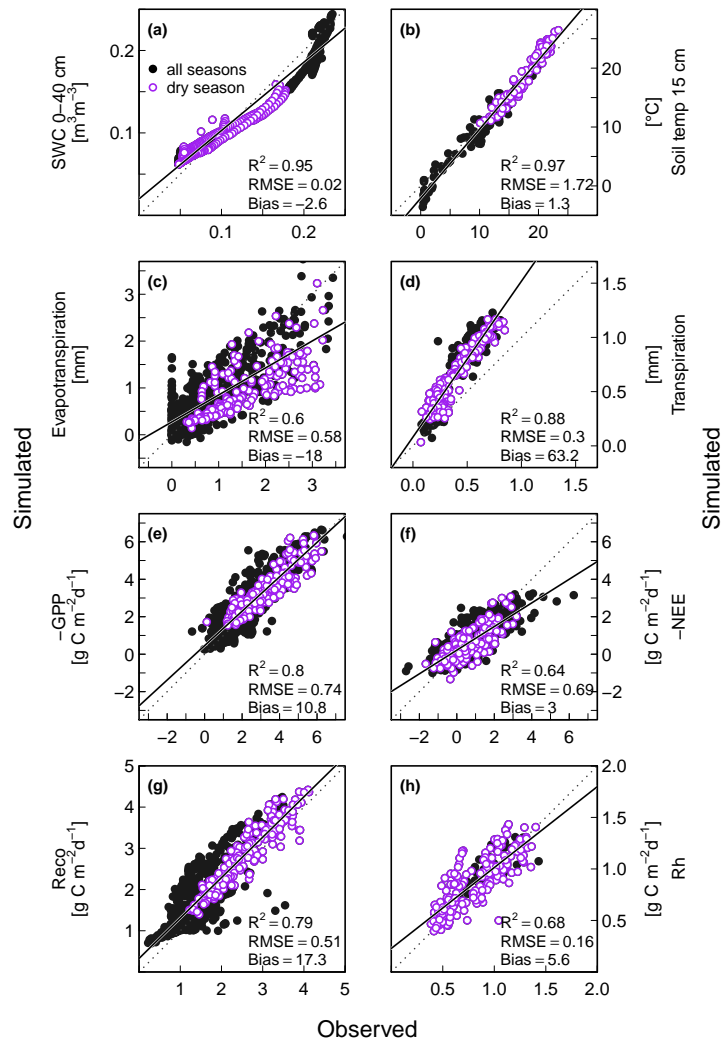

Figure S3: Relationship between simulated and observed daily averages in 2010 and 2011. The regression between simulated and observed values for all seasons is provided by the solid line, and the  $R^2$ , RMSE (root mean square error) and percent mean bias are given. The dry seasons (July, August and September) are highlighted with the open circles (see legend), and the ideal one-to-one relationship is depicted by the dotted line.

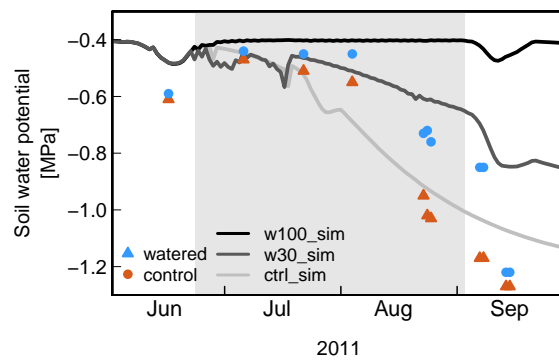

Figure S4: The dynamics of observed and simulated soil water potential (SWP; i.e. predawn leaf water potential) for control and watered treatment during the summer 2011. The simulation run  $w100_{sim}$  equals the irrigation treatment and the  $w30_{sim}$  simulates 30% of the water added. The duration of the watering treatment is highlighted by the gray area. Note the relative good accordance of the field watered treatment with the  $w30_{sim}$  during the irrigation period, and fast declines of observed SWP thereafter. Observed SWP for the control matched the simulation ( $ctrl_{sim}$ ) relatively well, but was overestimated by the model in September.
